# Supplementary material for: The Clinical Value of Blood miR-654-5p, miR-126, miR-10b, and miR-144 in the Diagnosis of Colorectal Cancer
Source: Hindawi journal article supplement (doi:10.1155/2022/8225966), 2022-10-13
Supplement: f1 [file 8225966.f1.pdf]

| sample ID | group | age | sex       | stage | class | tumourlocation |
|-----------|-------|-----|-----------|-------|-------|----------------|
| 2         | test  |     | 79 male   |       | 1 CRC | colon          |
| 5         | test  |     | 71 female |       | 3 CRC | rectum         |
| 7         | test  |     | 82 female |       | 1 CRC | rectum         |
| 8         | test  |     | 57 male   |       | 4 CRC | rectum         |
| 9         | test  |     | 52 male   |       | 3 CRC | rectum         |
| 10        | test  |     | 70 male   |       | 4 CRC | colon          |
| 12        | test  |     | 55 male   |       | 3 CRC | colon          |
| 16        | test  |     | 74 female |       | 4 CRC | colon          |
| 17        | test  |     | 58 male   |       | 3 CRC | rectum         |
| 18        | test  |     | 62 female |       | 3 CRC | rectum         |
| 19        | test  |     | 59 female |       | 4 CRC | rectum         |
| 21        | test  |     | 53 female |       | 3 CRC | rectum         |
| 24        | test  |     | 58 female |       | 2 CRC | rectum         |
| 26        | test  |     | 60 female |       | 2 CRC | colon          |
| 28        | test  |     | 58 male   |       | 3 CRC | rectum         |
| 29        | test  |     | 57 female |       | 3 CRC | rectum         |
| 33        | test  |     | 55 female |       | 1 CRC | rectum         |
| 34        | test  |     | 85 female |       | 3 CRC | colon          |
| 35        | test  |     | 53 female |       | 4 CRC | rectum         |
| 36        | test  |     | 64 male   |       | 4 CRC | colon          |
| 37        | test  |     | 72 male   |       | 3 CRC | colon          |
| 39        | test  |     | 57 male   |       | 4 CRC | rectum         |
| 43        | test  |     | 68 female |       | 3 CRC | rectum         |
| 45        | test  |     | 64 male   |       | 2 CRC | rectum         |
| 47        | test  |     | 63 male   |       | 2 CRC | colon          |
| 50        | test  |     | 85 female |       | 4 CRC | colon          |
| 52        | test  |     | 59 male   |       | 4 CRC | colon          |
| 53        | test  |     | 65 female |       | 4 CRC | colon          |
| 55        | test  |     | 89 male   |       | 4 CRC | colon          |
| 56        | test  |     | 57 male   |       | 2 CRC | colon          |
| 59        | test  |     | 70 male   |       | 4 CRC | rectum         |
| 61        | test  |     | 59 male   |       | 3 CRC | colon          |
| 62        | test  |     | 54 male   |       | 1 CRC | rectum         |
| 66        | test  |     | 70 female |       | 3 CRC | colon          |
| 67        | test  |     | 80 female |       | 3 CRC | rectum         |
| 68        | test  |     | 55 female |       | 4 CRC | rectum         |
| 70        | test  |     | 55 female |       | 2 CRC | colon          |

|          |           |       |        |
|----------|-----------|-------|--------|
| 73 test  | 55 male   | 2 CRC | colon  |
| 75 test  | 82 male   | 1 CRC | rectum |
| 76 test  | 78 female | 4 CRC | colon  |
| 77 test  | 58 male   | 3 CRC | rectum |
| 78 test  | 52 male   | 4 CRC | colon  |
| 79 test  | 64 male   | 3 CRC | rectum |
| 82 test  | 73 female | 4 CRC | colon  |
| 83 test  | 69 female | 1 CRC | colon  |
| 85 test  | 68 female | 3 CRC | rectum |
| 86 test  | 59 female | 1 CRC | colon  |
| 88 test  | 79 male   | 2 CRC | colon  |
| 92 test  | 57 male   | 3 CRC | rectum |
| 94 test  | 55 female | 2 CRC | rectum |
| 96 test  | 59 male   | 1 CRC | rectum |
| 97 test  | 59 female | 4 CRC | rectum |
| 100 test | 72 female | 1 CRC | rectum |
| 103 test | 72 female | 3 CRC | rectum |
| 105 test | 71 female | 4 CRC | colon  |
| 110 test | 64 female | 1 CRC | rectum |
| 114 test | 76 male   | 4 CRC | colon  |
| 116 test | 55 male   | 2 CRC | colon  |
| 117 test | 53 female | 4 CRC | rectum |
| 121 test | 66 female | 4 CRC | rectum |
| 123 test | 67 male   | 2 CRC | colon  |
| 127 test | 58 male   | 1 CRC | rectum |
| 128 test | 65 male   | 4 CRC | colon  |
| 130 test | 84 male   | 2 CRC | rectum |
| 134 test | 79 female | 4 CRC | colon  |
| 136 test | 90 male   | 4 CRC | colon  |
| 137 test | 73 female | 4 CRC | colon  |
| 139 test | 57 male   | 1 CRC | colon  |
| 140 test | 62 female | 2 CRC | colon  |
| 145 test | 88 female | 3 CRC | rectum |
| 147 test | 82 female | 2 CRC | rectum |
| 150 test | 81 female | 2 CRC | rectum |
| 152 test | 84 female | 1 CRC | rectum |
| 155 test | 57 female | 1 CRC | colon  |
| 164 test | 55 male   | 4 CRC | rectum |

|          |           |       |        |
|----------|-----------|-------|--------|
| 170 test | 57 male   | 3 CRC | colon  |
| 172 test | 57 female | 1 CRC | rectum |
| 175 test | 59 male   | 3 CRC | rectum |
| 176 test | 54 female | 1 CRC | colon  |
| 177 test | 58 female | 1 CRC | colon  |
| 179 test | 57 male   | 4 CRC | colon  |
| 180 test | 56 female | 3 CRC | rectum |
| 182 test | 54 male   | 1 CRC | colon  |
| 183 test | 63 female | 3 CRC | rectum |
| 184 test | 72 male   | 4 CRC | colon  |
| 185 test | 60 male   | 3 CRC | rectum |
| 186 test | 85 male   | 2 CRC | rectum |
| 187 test | 83 male   | 1 CRC | rectum |
| 188 test | 80 male   | 3 CRC | colon  |
| 189 test | 87 female | 4 CRC | colon  |
| 190 test | 88 female | 1 CRC | rectum |
| 194 test | 66 male   | 1 CRC | rectum |
| 195 test | 60 female | 2 CRC | rectum |
| 197 test | 88 male   | 3 CRC | rectum |
| 203 test | 81 female | 1 CRC | rectum |
| 205 test | 59 male   | 1 CRC | colon  |
| 209 test | 52 female | 3 CRC | rectum |
| 214 test | 90 female | 1 CRC | rectum |
| 218 test | 67 male   | 3 CRC | rectum |
| 220 test | 56 male   | 3 CRC | rectum |
